# Supplementary material for: Mental Health Care for Vulnerable People With Complex Needs in Low-Income Countries: Two Services in West Africa
Source: Atypon-hosted journal article supplement (doi:10.1176/appi.ps.201500066), 2015-06-15
Supplement: appi.ps.201500066.ds001.pdf [file appi.ps.201500066.ds001.pdf]

## **Common Strengths and Weaknesses of Amaudo Itumbauzo and Association St. Camille de Lellis**

### **Common Strengths**

- Strong social and recovery focus towards community reintegration
- Conceptual models and practice derived from strong ethical stance, and learned experience in local context
- Very strong commitment of staff, local and international volunteers, and financial supporters
- Reliable support from local and international networks including the church
- Capacity for long-term sustainability despite economic hardship and war
- Positive impact on broader system and community attitudes

### **Common weaknesses**

- Reliance on charismatic leader makes replication and sustainability difficult, though there is some progress away from this
- Charity model can be disempowering for service users and service itself
- Insecurity of resources based on individual donations
- Poor pay of staff and lack of permanently employed professionals
- Inconsistency of medical standards and medication availability
- Financial and management challenges in scaling-up
